# Supplementary material
Source: PubMed Central journal article supplement (PMC3693859)
Supplement: NIHMS478352-supplement-1_si_001.pdf [file NIHMS478352-supplement-1_si_001.pdf]

# Supporting Information

## Estimation of ligand efficacies of metabotropic glutamate receptors from conformational forces obtained from molecular dynamics simulations

*Sirish Kaushik Lakkaraju<sup>1</sup>, Fengtian Xue<sup>1,2</sup>, Alan I. Faden<sup>2</sup>, Alexander D. MacKerell, Jr.<sup>1,\*</sup>*

<sup>1</sup>Department of Pharmaceutical Sciences, School of Pharmacy, University of Maryland, 20 Penn St, Baltimore, MD 21201.

<sup>2</sup>Department of Anesthesiology, School of Medicine, University of Maryland, 20 Penn St, Baltimore, MD 21201.

\* Corresponding Author; email: alex@outerbanks.umaryland.edu

## Table of Contents

|                                                                                                                                                                                                                                                                                                                                                                                                                                                                                                                                                       |    |
|-------------------------------------------------------------------------------------------------------------------------------------------------------------------------------------------------------------------------------------------------------------------------------------------------------------------------------------------------------------------------------------------------------------------------------------------------------------------------------------------------------------------------------------------------------|----|
| <b>Validation of Ligand Parameters.</b> .....                                                                                                                                                                                                                                                                                                                                                                                                                                                                                                         | 4  |
| <b>Figure S1.</b> Atom Numbering for DHPG .....                                                                                                                                                                                                                                                                                                                                                                                                                                                                                                       | 4  |
| <b>Table S1.</b> MM and MP2/6-31G* level equilibrium geometry of DHPG. ....                                                                                                                                                                                                                                                                                                                                                                                                                                                                           | 4  |
| <b>Figure S2.</b> Atom numbering for ACPT-II. ....                                                                                                                                                                                                                                                                                                                                                                                                                                                                                                    | 6  |
| <b>Table S2.</b> MM and MP2/6-31G* level equilibrium geometry of ACPT-II. ....                                                                                                                                                                                                                                                                                                                                                                                                                                                                        | 6  |
| <b>Table S3.</b> Scaled MP2/6-31G* and MM level vibrational spectra of DHPG .....                                                                                                                                                                                                                                                                                                                                                                                                                                                                     | 10 |
| <b>Table S4</b> Scaled MP2/6-31G* and MM level vibrational spectra of ACPT-II. ....                                                                                                                                                                                                                                                                                                                                                                                                                                                                   | 12 |
| <b>Figure S3.</b> Potential energy scan in QM and MM for the C2-C1-C7-N dihedral. ....                                                                                                                                                                                                                                                                                                                                                                                                                                                                | 15 |
| <b>Figure S4.</b> Root Mean Squared Deviation (RMSD) of the backbone atoms of the dimeric LBR-<br>ligand complexes (excluding the loops: 33-38, 125-153, 378-410 and 513-22 for mGluR1 and<br>14-24, 116-140, 360-390, 496-505 for mGluR5) through unconstrained 32 ns explicit water MD<br>simulations. Distances between the pocket $\alpha$ -carbon atoms pairs from these runs are used to plot<br>the conformationally sampled free energy surfaces in Fig. 5 and 6. ....                                                                        | 16 |
| <b>Table S5.</b> Fraction of the simulation time spent by the mGluR1+ligand complexes in the closed<br>and maximally open conformations. The maximally opened state is defined as a conformation<br>(defined by the inter-lobe distances, $d^i$ and $d^o$ ) when the sampled free energy is the lowest. When<br>the minima conformation ( $d^i$ , $d^o$ ) is less than 1 Å from the closed conformation (defined by $d^i$<br>and $d^o$ of mGluR1+Glu), then it is treated as closed conformation. Same definition is applicable<br>for Table S6. .... | 17 |
| <b>Table S6.</b> Fraction of the simulation time spent by the mGluR5+ligand complexes in the closed<br>and maximally open conformations. ....                                                                                                                                                                                                                                                                                                                                                                                                         | 17 |

## Validation of Ligand Parameters

All ligands were initially constructed based on the internal coordinates in CGenFF<sup>1</sup> and assigned physiologically pertinent protonation states consistent with neutral pH. CGenFF parameters are assigned based on analogy between the atoms of the ligands and previously optimized parameters of similar atom types.<sup>2, 3</sup> The accuracy of the prediction is scored with a penalty number. These penalty scores for all the parameters of all the ligands used in the study were low (less than 10) indicating the analogy is satisfactory, requiring little or no further optimization as recommended by the CGenFF protocol. This was expected as the functionalities in the studied ligands are common to amino acids as well as drug-like molecules and therefore well represented in CGenFF. However, the MM parameters for DHPG, and ACPT-II were validated targeting QM vibrational spectra, geometries and potential energy surfaces.<sup>4</sup>

## VIBRATIONAL SPECTRA

The quantum mechanical (QM) target vibrational frequency spectra for the ligands were calculated after an MP2/6-31G\* level geometry optimization of the ligands with tight tolerances. This MP2/6-31G\* vibrational spectrum was sufficiently well reproduced by the molecular mechanical (MM) model using the CGenFF bond, valence angle, Urey-Bradley, improper and torsion force constant parameters. The QM F-matrix is scaled by a factor of 0.89, which corresponds to scaling all frequencies by a factor 0.943<sup>5</sup> and a symbolic potential energy distribution (PED) analysis was performed in the local internal valence coordinate space proposed by Pulay et al<sup>6</sup>. The PED analysis in MM was performed using the MOLVIB<sup>7</sup> module in CHARMM.<sup>8</sup> Equilibrium geometry and vibrational spectra for DHPG and ACPT-II are

shown in Table S1. MM and MP2/6-31G\* level equilibrium geometry of DHPG. Table S1, Table S2, Table S3 and Table S4, respectively.

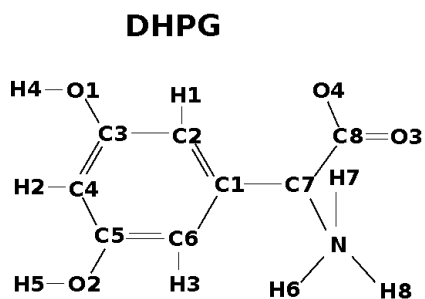

**Figure S1.** Atom Numbering for DHPG

**Table S1.** MM and MP2/6-31G\* level equilibrium geometry of DHPG.

| Coordinate | QM    | MM    | Difference |
|------------|-------|-------|------------|
| Bonds      |       |       |            |
| C1-C2      | 1.401 | 1.413 | 0.012      |
| C1-C6      | 1.397 | 1.412 | 0.015      |
| C1-C7      | 1.500 | 1.501 | 0.001      |
| C2-C3      | 1.397 | 1.396 | -0.001     |
| C2-H1      | 1.090 | 1.081 | -0.008     |
| C3-C4      | 1.395 | 1.396 | 0.001      |
| C3-O1      | 1.370 | 1.395 | 0.025      |
| C4-C5      | 1.394 | 1.396 | 0.003      |
| C4-H2      | 1.085 | 1.080 | -0.005     |
| C5-C6      | 1.399 | 1.399 | 0.000      |
| C5-O2      | 1.372 | 1.407 | 0.034      |
| C6-H3      | 1.090 | 1.079 | -0.010     |
| H1-O3      | 2.506 | 2.507 | 0.001      |
| O1-H4      | 0.974 | 0.960 | -0.014     |
| O2-H5      | 0.974 | 0.958 | -0.015     |
| C7-N       | 1.516 | 1.474 | -0.042     |
| C7-H9      | 1.092 | 1.112 | 0.020      |
| C7-C8      | 1.582 | 1.537 | -0.044     |
| C8-O3      | 1.285 | 1.264 | -0.021     |
| C8-O4      | 1.233 | 1.249 | 0.016      |
| Angles     |       |       |            |
| C2-C1-C6   | 120.6 | 118.5 | -2.0       |
| C2-C1-C7   | 118.5 | 121.7 | 3.2        |
| C6-C1-C7   | 120.8 | 119.7 | -1.1       |
| C1-C2-C3   | 119.1 | 120.6 | 1.5        |
| C1-C2-H1   | 119.5 | 119.6 | 0.1        |
| C3-C2-H1   | 121.3 | 119.8 | -1.4       |
| C2-C3-C4   | 121.0 | 120.2 | -0.8       |
| C2-C3-O1   | 122.5 | 119.8 | -2.7       |
| C4-C3-O1   | 116.5 | 120.0 | 3.4        |
| C3-C4-C5   | 119.2 | 119.9 | 0.8        |

|                  |        |        |      |
|------------------|--------|--------|------|
| C3-C4-H2         | 120.4  | 119.9  | -0.5 |
| C5-C4-H2         | 120.4  | 120.1  | -0.3 |
| C4-C5-C6         | 120.8  | 120.2  | -0.6 |
| C4-C5-O2         | 116.6  | 119.5  | 2.9  |
| C6-C5-O2         | 122.6  | 120.3  | -2.3 |
| C1-C6-C5         | 119.3  | 120.4  | 1.2  |
| C1-C6-H3         | 120.2  | 119.9  | -0.3 |
| C5-C6-H3         | 120.5  | 119.6  | -0.9 |
| C3-O1-H4         | 108.4  | 107.6  | -0.8 |
| C5-O2-H5         | 108.6  | 108.4  | -0.2 |
| C1-C7-N          | 108.6  | 108.3  | -0.3 |
| C1-C7-H9         | 112.3  | 111.8  | -0.4 |
| C1-C7-C8         | 111.5  | 111.8  | 0.3  |
| N-C7-H9          | 109.7  | 108.6  | -1.1 |
| N-C7-C8          | 102.9  | 104.4  | 1.5  |
| H9-C7-C8         | 111.5  | 110.7  | -0.8 |
| C7-N-H6          | 96.7   | 99.6   | 2.9  |
| C7-N-H7          | 113.4  | 113.4  | 0.0  |
| C7-N-H8          | 113.1  | 112.0  | -1.2 |
| H6-N-H7          | 113.9  | 111.1  | -2.8 |
| H6-N-H8          | 109.4  | 108.8  | -0.7 |
| H7-N-H8          | 109.7  | 110.1  | 0.3  |
| C7-C8-O3         | 111.0  | 112.2  | 1.2  |
| C7-C8-O4         | 116.3  | 117.4  | 1.1  |
| O3-C8-O4         | 132.7  | 131.4  | -1.3 |
| <b>Dihedrals</b> |        |        |      |
| C6-C1-C2-C3      | 1.5    | -0.6   | -2.1 |
| C6-C1-C2-H1      | 177.3  | 177.6  | 0.3  |
| C7-C1-C2-C3      | 178.5  | 176.4  | -2.1 |
| C7-C1-C2-H1      | -5.7   | -5.3   | 0.3  |
| C2-C1-C6-C5      | -1.8   | 1.1    | 2.9  |
| C2-C1-C6-H3      | -179.3 | -179.0 | 0.3  |
| C7-C1-C6-C5      | -178.7 | -176.0 | 2.7  |
| C7-C1-C6-H3      | 3.8    | 3.9    | 0.1  |
| C2-C1-C7-N       | -67.9  | -64.2  | 3.7  |
| C2-C1-C7-H9      | 170.7  | 169.3  | -1.4 |
| C2-C1-C7-C8      | 44.8   | 46.5   | 1.7  |
| C6-C1-C7-N       | 109.1  | 107.8  | -1.3 |
| C6-C1-C7-H9      | -12.3  | -13.7  | -1.4 |
| C6-C1-C7-C8      | -138.3 | -136.5 | 1.8  |
| C1-C2-C3-C4      | -1.5   | -0.8   | 0.7  |
| C1-C2-C3-O1      | 179.1  | 179.1  | 0.0  |
| H1-C2-C3-C4      | -177.3 | -179.0 | -1.7 |
| H1-C2-C3-O1      | 3.3    | 0.8    | -2.5 |
| C2-C3-C4-C5      | 1.9    | 1.8    | -0.1 |
| C2-C3-C4-H2      | 179.2  | -180.0 | 0.8  |
| O1-C3-C4-C5      | -178.7 | -178.0 | 0.7  |
| O1-C3-C4-H2      | -1.4   | 0.2    | 1.6  |
| C2-C3-O1-H4      | -6.7   | -8.9   | -2.1 |
| C4-C3-O1-H4      | 173.8  | 173.0  | -0.9 |

|             |        |        |      |
|-------------|--------|--------|------|
| C3-C4-C5-C6 | -2.2   | -1.4   | 0.8  |
| C3-C4-C5-O2 | 179.1  | 178.9  | -0.2 |
| H2-C4-C5-C6 | -179.5 | -179.6 | -0.1 |
| H2-C4-C5-O2 | 1.8    | 0.7    | -1.1 |
| C4-C5-C6-C1 | 2.2    | -0.1   | -2.2 |
| C4-C5-C6-H3 | 179.7  | -180.0 | 0.3  |
| O2-C5-C6-C1 | -179.2 | 179.7  | 0.5  |
| O2-C5-C6-H3 | -1.7   | -0.2   | 1.4  |
| C4-C5-O2-H5 | -175.1 | -174.5 | 0.6  |
| C6-C5-O2-H5 | 6.2    | 8.8    | 2.6  |
| C1-C7-N-H6  | 101.3  | 104.6  | 3.4  |
| C1-C7-N-H7  | -18.4  | -17.2  | 1.2  |
| C1-C7-N-H8  | -144.2 | -140.5 | 3.7  |
| H9-C7-N-H6  | -135.7 | -136.5 | -0.8 |
| H9-C7-N-H7  | 104.6  | 101.6  | -3.0 |
| H9-C7-N-H8  | -21.2  | -22.3  | -1.1 |
| C8-C7-N-H6  | -17.0  | -18.4  | -1.4 |
| C8-C7-N-H7  | -136.7 | 136.5  | -0.1 |
| C8-C7-N-H8  | 97.5   | -95.7  | -1.8 |
| C1-C7-C8-O3 | -97.0  | -95.7  | -1.2 |
| C1-C7-C8-O4 | 80.5   | 80.8   | 0.3  |
| N-C7-C8-O3  | 19.2   | 17.3   | -1.9 |
| N-C7-C8-O4  | -163.3 | 164.3  | 0.9  |
| H9-C7-C8-O3 | 136.7  | 134.4  | -2.2 |
| H9-C7-C8-O4 | -45.9  | -46.0  | -0.1 |

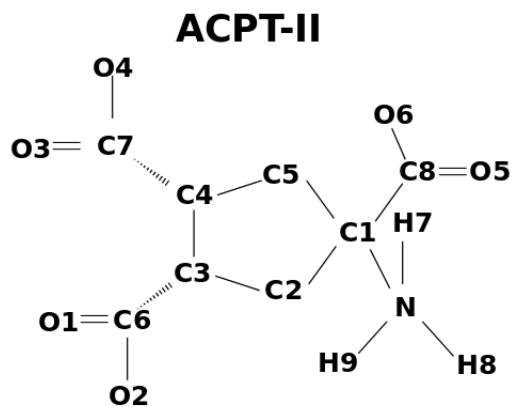

**Figure S2.** Atom numbering for ACPT-II.

**Table S2.** MM and MP2/6-31G\* level equilibrium geometry of ACPT-II.

| Coordinate | QM | MM | Difference |
|------------|----|----|------------|
| Bonds      |    |    |            |

|          |       |       |        |
|----------|-------|-------|--------|
| C1-C2    | 1.524 | 1.526 | 0.002  |
| C1-C5    | 1.518 | 1.530 | 0.012  |
| C1-N     | 1.528 | 1.480 | -0.048 |
| C1-C8    | 1.558 | 1.519 | -0.039 |
| C2-C3    | 1.545 | 1.562 | 0.017  |
| C2-H1    | 1.101 | 1.096 | -0.005 |
| C2-H2    | 1.094 | 1.105 | 0.011  |
| C3-C4    | 1.574 | 1.602 | 0.028  |
| C3-H3    | 1.104 | 1.101 | -0.003 |
| C3-C6    | 1.571 | 1.514 | -0.056 |
| C4-C5    | 1.538 | 1.552 | 0.014  |
| C4-C7    | 1.571 | 1.509 | -0.062 |
| C4-H4    | 1.105 | 1.101 | -0.004 |
| C5-H5    | 1.101 | 1.095 | -0.006 |
| C5-H6    | 1.092 | 1.104 | 0.012  |
| C6-O1    | 1.265 | 1.266 | 0.001  |
| C6-O2    | 1.263 | 1.258 | -0.004 |
| C7-O3    | 1.261 | 1.264 | 0.002  |
| C7-O4    | 1.266 | 1.260 | -0.006 |
| C8-O5    | 1.294 | 1.266 | -0.027 |
| C8-O6    | 1.244 | 1.257 | 0.013  |
| Angles   |       |       |        |
| C2-C1-C5 | 101.1 | 102.1 | 1.0    |
| C2-C1-N  | 106.3 | 105.6 | -0.7   |
| C2-C1-C8 | 117.2 | 120.0 | 2.8    |
| C5-C1-N  | 107.7 | 107.9 | 0.2    |
| C5-C1-C8 | 120.7 | 120.5 | -0.1   |
| N-C1-C8  | 103.0 | 100.4 | -2.5   |
| C1-C2-C3 | 104.8 | 105.3 | 0.5    |
| C1-C2-H1 | 113.0 | 115.1 | 2.1    |
| C1-C2-H2 | 107.9 | 108.3 | 0.3    |
| C3-C2-H1 | 114.3 | 113.0 | -1.4   |
| C3-C2-H2 | 108.0 | 109.6 | 1.6    |
| H1-C2-H2 | 108.5 | 105.5 | -3.0   |
| C2-C3-C4 | 103.9 | 104.3 | 0.5    |
| C2-C3-H3 | 110.3 | 107.1 | -3.2   |
| C2-C3-C6 | 108.3 | 111.5 | 3.2    |
| C4-C3-H3 | 109.4 | 108.4 | -1.0   |
| C4-C3-C6 | 120.0 | 120.6 | 0.6    |
| H3-C3-C6 | 104.9 | 104.9 | -0.1   |
| C3-C4-C5 | 105.2 | 104.2 | -1.0   |
| C3-C4-C7 | 120.5 | 122.8 | 2.3    |
| C3-C4-H4 | 106.3 | 104.2 | -2.0   |
| C5-C4-C7 | 113.4 | 114.1 | 0.8    |
| C5-C4-H4 | 108.5 | 105.8 | -2.7   |
| C7-C4-H4 | 102.3 | 101.7 | -0.5   |
| C1-C5-C4 | 103.7 | 103.9 | 0.2    |
| C1-C5-H5 | 113.1 | 114.7 | 1.7    |
| C1-C5-H6 | 109.7 | 109.3 | -0.4   |

|                  |        |        |      |
|------------------|--------|--------|------|
| C4-C5-H5         | 113.9  | 113.2  | -0.7 |
| C4-C5-H6         | 109.3  | 109.6  | 0.4  |
| H5-C5-H6         | 107.2  | 106.1  | -1.1 |
| C3-C6-O1         | 115.1  | 115.3  | 0.3  |
| C3-C6-O2         | 114.7  | 117.6  | 2.9  |
| O1-C6-O2         | 130.0  | 128.8  | -1.1 |
| C4-C7-O3         | 114.4  | 115.6  | 1.3  |
| C4-C7-O4         | 115.5  | 117.2  | 1.7  |
| O3-C7-O4         | 129.8  | 126.9  | -2.9 |
| C1-N-H7          | 110.6  | 106.8  | -3.8 |
| C1-N-H8          | 98.6   | 99.8   | 1.2  |
| C1-N-H9          | 110.7  | 108.9  | -1.7 |
| H7-N-H8          | 116.7  | 115.1  | -1.6 |
| H7-N-H9          | 108.3  | 109.1  | 0.8  |
| H8-N-H9          | 111.7  | 111.8  | 0.2  |
| C1-C8-O5         | 113.6  | 115.7  | 2.0  |
| C1-C8-O6         | 117.4  | 117.2  | -0.2 |
| O5-C8-O6         | 128.9  | 126.7  | -2.2 |
| <b>Dihedrals</b> |        |        |      |
| C5-C1-C2-C3      | -43.5  | -40.7  | 2.8  |
| C5-C1-C2-H1      | -168.6 | -165.8 | 2.8  |
| C5-C1-C2-H2      | 71.4   | 73.5   | 2.0  |
| N-C1-C2-C3       | 68.9   | 72.0   | 3.1  |
| N-C1-C2-H1       | -56.3  | -53.1  | 3.1  |
| N-C1-C2-H2       | -176.2 | -175.9 | 0.4  |
| C8-C1-C2-C3      | -176.7 | -177.1 | -0.4 |
| C8-C1-C2-H1      | 58.2   | 57.8   | -0.3 |
| C8-C1-C2-H2      | -61.8  | -59.9  | 1.9  |
| C2-C1-C5-C4      | 44.8   | 44.9   | 0.0  |
| C2-C1-C5-H5      | 168.6  | 168.9  | 0.3  |
| C2-C1-C5-H6      | -71.8  | -72.1  | -0.3 |
| N-C1-C5-C4       | -66.5  | -66.1  | 0.3  |
| N-C1-C5-H5       | 57.3   | 58.0   | 0.6  |
| N-C1-C5-H6       | 176.9  | 176.9  | 0.0  |
| C8-C1-C5-C4      | 175.9  | -179.1 | 3.2  |
| C8-C1-C5-H5      | -60.3  | -60.0  | 0.2  |
| C8-C1-C5-H6      | 59.3   | 61.9   | 2.6  |
| C2-C1-N-H7       | -10.6  | -12.9  | -2.3 |
| C2-C1-N-H8       | 112.2  | 112.1  | -0.2 |
| C2-C1-N-H9       | -130.6 | -130.5 | 0.1  |
| C5-C1-N-H7       | 97.1   | 92.7   | -4.4 |
| C5-C1-N-H8       | -140.1 | -141.4 | -1.3 |
| C5-C1-N-H9       | -22.9  | -21.9  | 1.0  |
| C8-C1-N-H7       | -134.3 | -132.8 | 1.6  |
| C8-C1-N-H8       | -11.5  | -12.9  | -1.3 |
| C8-C1-N-H9       | 105.6  | 104.6  | -1.0 |
| C2-C1-C8-O5      | -107.8 | -107.2 | 0.6  |
| C2-C1-C8-O6      | 71.0   | 69.2   | -1.9 |
| C5-C1-C8-O5      | 128.4  | -130.6 | 2.2  |
| C5-C1-C8-O6      | -52.7  | -50.8  | -2.0 |



|             |        |        |      |
|-------------|--------|--------|------|
| N-C1-C8-O5  | 8.5    | 7.0    | -1.4 |
| N-C1-C8-O6  | -172.7 | -174.6 | -1.9 |
| C1-C2-C3-C4 | 25.0   | 22.9   | -2.1 |
| C1-C2-C3-H3 | -92.1  | -89.4  | 2.7  |
| C1-C2-C3-C6 | 153.6  | 156.5  | 2.9  |
| H1-C2-C3-C4 | 149.3  | 147.3  | -2.0 |
| H1-C2-C3-H3 | 32.2   | 33.1   | 0.9  |
| H1-C2-C3-C6 | -82.1  | -81.1  | 1.0  |
| H2-C2-C3-C4 | -89.9  | -91.4  | -1.5 |
| H2-C2-C3-H3 | 153.0  | 154.3  | 1.4  |
| H2-C2-C3-C6 | 38.7   | 40.2   | 1.5  |
| C2-C3-C4-C5 | 2.7    | 6.5    | 3.8  |
| C2-C3-C4-C7 | 132.4  | 130.2  | -2.2 |
| C2-C3-C4-H4 | -112.2 | -114.3 | -2.0 |
| H3-C3-C4-C5 | 120.5  | 118.7  | -1.8 |
| H3-C3-C4-C7 | -109.9 | -107.6 | 2.3  |
| H3-C3-C4-H4 | 5.5    | 7.9    | 2.4  |
| C6-C3-C4-C5 | -118.3 | -120.1 | -1.8 |
| C6-C3-C4-C7 | 11.4   | 11.6   | 0.2  |
| C6-C3-C4-H4 | 126.8  | 127.2  | 0.4  |
| C2-C3-C6-O1 | 119.0  | 120.5  | 1.5  |
| C2-C3-C6-O2 | -56.0  | -54.0  | 2.0  |
| C4-C3-C6-O1 | -122.2 | -121.0 | 1.2  |
| C4-C3-C6-O2 | 62.8   | 63.5   | 0.7  |
| H3-C3-C6-O1 | 1.2    | 1.0    | -0.2 |
| H3-C3-C6-O2 | -173.8 | -171.5 | 2.3  |
| C3-C4-C5-C1 | -29.5  | -31.5  | -2.0 |
| C3-C4-C5-H5 | -152.8 | -156.5 | -3.8 |
| C3-C4-C5-H6 | 87.4   | 85.3   | -2.1 |
| C7-C4-C5-C1 | -163.2 | -165.9 | -2.7 |
| C7-C4-C5-H5 | 73.5   | 74.1   | 0.5  |
| C7-C4-C5-H6 | -46.3  | -45.1  | 1.2  |
| H4-C4-C5-C1 | 83.9   | 84.1   | 0.2  |
| H4-C4-C5-H5 | -39.4  | -38.0  | 1.4  |
| H4-C4-C5-H6 | -159.2 | -155.1 | 4.0  |
| C3-C4-C7-O3 | 64.5   | 67.0   | 2.5  |
| C3-C4-C7-O4 | -121.1 | -122.4 | -1.3 |
| C5-C4-C7-O3 | -169.6 | -167.2 | 2.4  |
| C5-C4-C7-O4 | 4.9    | 4.4    | -0.4 |
| H4-C4-C7-O3 | -53.0  | -52.8  | 0.2  |
| H4-C4-C7-O4 | 121.5  | 121.9  | 0.4  |

**Table S3.** Scaled MP2/6-31G\* and MM level vibrational spectra of DHPG<sup>1</sup>

| QM(scaled by a factor 0.943) |          |    |          |    |          |    | MM    |          |    |          |    |          |    |
|------------------------------|----------|----|----------|----|----------|----|-------|----------|----|----------|----|----------|----|
| Freq                         | Mode     | %  | Mode     | %  | Mode     | %  | Freq  | Mode     | %  | Mode     | %  | Mode     | %  |
| 26                           | torC7-C1 | 92 |          |    |          |    | 40.4  | torC7-C1 | 92 |          |    |          |    |
| 64.5                         | torC7-C8 | 70 |          |    |          |    | 72.8  | torC7-C8 | 77 |          |    |          |    |
| 95.9                         | dC1C7C8  | 36 | wC1H     | 25 |          |    | 99.2  | wC1H     | 48 | dC1C7C8  | 15 |          |    |
| 150.6                        | dC1H     | 32 | wC1H     | 17 |          |    | 165.5 | dC1H     | 38 |          |    |          |    |
| 203.8                        | tp6RNG1  | 38 | ta6RNG1a | 21 |          |    | 192.2 | wC5H     | 25 | wC3H     | 23 | ta6RNG1a | 20 |
| 216.3                        | ta6RNG1a | 24 |          |    |          |    | 204.6 | ta6RNG1  | 34 | wC3H     | 27 | wC5H     | 27 |
| 226.4                        | ta6RNG1  | 70 | ta6RNG1a | 24 |          |    | 238.2 | ta6RNG1  | 30 | wC3H     | 17 | wC5H     | 15 |
| 291                          | dNC7C1   | 23 | dC5H     | 20 | ta6RNG1a | 16 | 273.1 | dNC7C1   | 31 | ta6RNG1a | 16 |          |    |
| 311.7                        | torO2-C5 | 97 |          |    |          |    | 326.5 | torO2-C5 | 47 |          |    |          |    |
| 325.9                        | dC3H     | 31 | dC5H     | 18 | dNC7C1   | 16 | 334.6 | dC5H     | 22 | dC3H     | 19 |          |    |
| 335                          | dC8C7    | 53 | dC8C7N   | 26 |          |    | 341.8 | dC8C7    | 50 |          |    |          |    |
| 349.4                        | torO1-C3 | 94 |          |    |          |    | 350.7 | torO1-C3 | 81 |          |    |          |    |
| 363.4                        | torC7-N  | 85 |          |    |          |    | 361.2 | torC7-N  | 85 |          |    |          |    |
| 457                          | sC7-C8   | 23 | da6RNG1a | 19 |          |    | 421.2 | sC5-C6   | 15 |          |    |          |    |
| 483                          | da6RNG1  | 24 |          |    |          |    | 466.7 | da6RNG1  | 56 | wC2H     | 17 |          |    |
| 495.2                        | da6RNG1  | 51 |          |    |          |    | 492.2 | tp6RNG1  | 23 |          |    |          |    |
| 513.5                        | da6RNG1a | 34 | dC5H     | 15 |          |    | 502   | da6RNG1a | 24 | sC3-O1   | 17 | sC5-O2   | 15 |
| 526.6                        | tp6RNG1  | 45 | wC5H     | 40 | wC3H     | 26 | 526   | da6RNG1  | 50 |          |    |          |    |
| 553.5                        | dt6RNG1  | 16 |          |    |          |    | 549.6 | dNC7C1   | 25 | wC1H     | 20 | ta6RNG1a | 18 |

<sup>1</sup> Only vibrational modes with 15% or more contributions are shown here, but if no vibrational mode for a frequency higher than 15% contribution can be found, then the one with the highest contribution is shown. Notations for the PED are: daRNG1, dt6RNG1, t6RNG1, taRNG1, tpRNG1, asymmetric deformation, trigonal deformation, torsion, asymmetric torsion, and pucker; s stands for bond stretching, ss and sa stand for group symmetric and asymmetric stretching; r for rocking, i for twisting; w for wagging; c for scissoring; tor for torsions; same notation applied for the ACPT-II table below.



|        |        |    |  |  |        |        |    |        |    |
|--------|--------|----|--|--|--------|--------|----|--------|----|
| 1748.7 | sC8-O3 | 90 |  |  | 1662.8 | sC8-O3 | 81 | daNH   | 16 |
| 2714   | sN-H   | 93 |  |  | 2811.4 | sN-H   | 99 |        |    |
| 2999.5 | sC7-H  | 99 |  |  | 3053.4 | sC7-H  | 99 |        |    |
| 3026.1 | sC6-H3 | 99 |  |  | 3055.5 | sC6-H3 | 71 | sC2-H1 | 29 |
| 3029.4 | sC2-H1 | 99 |  |  | 3061.4 | sC2-H1 | 66 | sC6-H3 | 25 |
| 3081.2 | sC4-H2 | 99 |  |  | 3146.3 | sC4-H2 | 91 |        |    |
| 3172   | sN-H   | 99 |  |  | 3253.9 | sN-H   | 99 |        |    |
| 3268.3 | sN-H   | 99 |  |  | 3263.2 | sN-H   | 99 |        |    |
| 3536.2 | sO1-H  | 99 |  |  | 3681.4 | sO1-H  | 51 | sO2-H  | 49 |
| 3543.2 | sO2-H  | 99 |  |  | 3682.8 | sO2-H  | 51 | sO1-H  | 49 |

**Table S4** Scaled MP2/6-31G\* and MM level vibrational spectra of ACPT-II.

| QM (scaled by a factor of 0.943) |          |    |          |    |        | MM |       |          |    |          |    |          |    |
|----------------------------------|----------|----|----------|----|--------|----|-------|----------|----|----------|----|----------|----|
| Freq                             | Mode     | %  | Mode     | %  | Mode   | %  | Freq  | Mode     | %  | Mode     | %  | Mode     | %  |
| 27.9                             | torC8-C1 | 33 | t5RNG1   | 21 |        |    | 25.4  | torC8-C1 | 29 | ssC1H2   | 27 | torC7-C4 | 20 |
| 45.7                             | torC7-C4 | 61 | torC6-C3 | 19 |        |    | 38.2  | torC7-C4 | 28 | torC6-C3 | 22 |          |    |
| 56.5                             | torC8-C1 | 46 | t5RNG1   | 24 |        |    | 58.4  | t5RNG1a  | 30 | t5RNG1   | 29 |          |    |
| 64                               | torC6-C3 | 69 | torC7-C4 | 25 |        |    | 67    | torC6-C3 | 56 | torC7-C4 | 42 |          |    |
| 93.7                             | rC4H2    | 20 | dC6C3    | 18 |        |    | 126.5 | t5RNG1a  | 17 | rC1H2    | 17 |          |    |
| 101.5                            | rC1H2    | 18 | t5RNG1a  | 17 |        |    | 137.2 | iC4H2    | 23 | wC4H2    | 16 |          |    |
| 129.5                            | iC1H2    | 25 | wC1H2    | 21 | dC6C3  | 15 | 145.9 | wC1H2    | 22 | iC1H2    | 18 |          |    |
| 214.1                            | iC1H2    | 30 | saC4H2   | 20 | dC6C3  | 18 | 197.7 | iC1H2    | 35 | dC6C3    | 28 | dC6O1    | 19 |
| 237.8                            | rC3H2    | 17 |          |    |        |    | 236.1 | rC1H2    | 24 | d5RNG1   | 18 | t5RNG1   | 15 |
| 246                              | saC4H2   | 43 | dC6C3    | 21 | cC1H2  | 17 | 254.9 | dC6C3    | 72 | saC4H2   | 15 | dC6O1    | 12 |
| 293.2                            | dC6O1    | 67 | dC6C3    | 15 |        |    | 272.9 | saC4H2   | 50 | dC6C3    | 17 | torC8-C1 | 30 |
| 326.1                            | torN-C1  | 54 | torC8-C1 | 14 | saC1H2 | 14 | 330.6 | torN-C1  | 91 |          |    |          |    |
| 338.9                            | dC6C3    | 42 |          |    |        |    | 340.3 | saC4H2   | 30 | dC6C3    | 29 | dC6O1    | 10 |
| 388.7                            | dC8C1    | 25 | saC4H2   | 16 |        |    | 375.2 | dC6C3    | 67 | saC4H2   | 51 | dC6O1    | 23 |
| 397.1                            | torC8-C1 | 58 | cC1H2    | 36 | ssC1H2 | 4  | 377.8 | saC4H2   | 20 | dC6C3    | 40 | iC1H2    | 21 |
| 421.7                            | saC4H2   | 75 | dC6C3    | 20 | wC1H2  | 9  | 401.4 | torC8-C1 | 53 | cC1H2    | 16 | ssC1H2   | 10 |

|        |        |    |        |    |        |    |        |        |    |          |    |          |    |
|--------|--------|----|--------|----|--------|----|--------|--------|----|----------|----|----------|----|
| 485.2  | saC4H2 | 24 | dC6C3  | 14 | dC6O1  | 65 | 508.9  | saC4H2 | 11 | dC6C3    | 53 | dC7C4    | 18 |
| 517.5  | dC6C3  | 44 | dC7C4  | 31 | saC4H2 | 24 | 534.7  | dC6C3  | 57 | saC4H2   | 25 | dC8C1    | 30 |
| 537.8  | dC8C1  | 31 | saC4H2 | 22 | cC1H2  | 19 | 557.7  | saC4H2 | 11 | dC6O1    | 66 | dC6C3    | 28 |
| 615.5  | dC6C3  | 21 | saC4H2 | 13 | dC6O1  | 45 | 632.7  | dC6C3  | 68 | saC4H2   | 27 | dC6O1    | 18 |
| 682.8  | dC6O1  | 81 | saC4H2 | 14 | wC7C4  | 23 | 700.3  | dC8O5  | 22 |          |    |          |    |
| 704.7  | wC8C1  | 32 | saC4H2 | 28 | dC6O1  | 27 | 759.6  | dC6O1  | 14 | saC4H2   | 68 | dC7O3    | 15 |
| 712    | dC8O5  | 15 |        |    |        |    | 781.5  | dC6O1  | 39 | saC4H2   | 37 | dC7O3    | 28 |
| 722.9  | wC8C1  | 34 | dC7O3  | 16 |        |    | 791.2  | dC8O5  | 26 | dC6O1    | 19 | sC1-C2   | 16 |
| 748.6  | dC8O5  | 40 | ssC1H2 | 25 |        |    | 867.8  | wC8C1  | 46 | ssC1H2   | 20 |          |    |
| 767.4  | wC6C3  | 30 | dC6O1  | 29 | saC4H2 | 20 | 882.4  | saC4H2 | 45 | rC2H2    | 24 | dC6O1    | 21 |
| 779.7  | saC4H2 | 53 | dC6O1  | 13 | dC6C3  | 14 | 891    | saC4H2 | 63 | dC6C3    | 29 | wC6C3    | 11 |
| 863.2  | dC6O1  | 67 | saC4H2 | 11 | dC6C3  | 20 | 900.7  | wC7C4  | 48 | rC5H2    | 16 |          |    |
| 885.1  | saC1H2 | 36 |        |    |        |    | 922.2  | iC2H2  | 20 |          |    |          |    |
| 925.6  | saC4H2 | 18 | rC2H2  | 16 |        |    | 934.3  | saC4H2 | 34 | dC6C3    | 31 | rC2H2    | 29 |
| 943.2  | saC4H2 | 46 | dC6C3  | 8  |        |    | 946.5  | rC5H2  | 25 | saC4H2   | 19 |          |    |
| 975.7  | dC6C3  | 20 | sC2-C3 | 19 | iC5H2  | 17 | 980.4  | saC4H2 | 40 | dC6C3    | 31 | rC5H2    | 24 |
| 998.5  | saC4H2 | 48 | dC6C3  | 43 | rNH    | 18 | 1057.5 | saC4H2 | 16 |          |    |          |    |
| 1002.1 | rNH'   | 33 | sC5-C1 | 22 |        |    | 1111.9 | saC4H2 | 49 | dC6C3    | 38 | dC6O1    | 21 |
| 1047.9 | sC3-C4 | 28 | sC4-C5 | 21 |        |    | 1165   | iC5H2  | 25 | dsNH     | 18 |          |    |
| 1093.6 | dC6C3  | 28 | saC4H2 | 26 | iC5H2  | 23 | 1205.4 | dC6C3  | 66 | saC4H2   | 15 | sC2-C3   | 27 |
| 1140.5 | rNH    | 24 | rNH'   | 16 |        |    | 1210.1 | rNH    | 49 | torC8-C1 | 20 |          |    |
| 1179.1 | wC5H2  | 27 | wC2H2  | 23 |        |    | 1249.7 | wC4H2  | 36 |          |    |          |    |
| 1191.8 | cC3H2  | 34 | cC4H2  | 15 |        |    | 1268.5 | iC2H2  | 21 |          |    |          |    |
| 1232.6 | dsNH   | 27 | sC8-O5 | 17 |        |    | 1317.6 | dsNH   | 62 |          |    |          |    |
| 1243.7 | cC4H2  | 19 |        |    |        |    | 1334.4 | wC5H2  | 57 |          |    |          |    |
| 1259.6 | wC3H2  | 19 | iC3H2  | 16 |        |    | 1352.9 | wC2H2  | 54 | sC6-O1   | 15 |          |    |
| 1270.3 | wC4H2  | 36 | iC4H2  | 21 | sC6-O1 | 17 | 1367.2 | ssC1H2 | 20 | iC2H2    | 17 | saC1H2   | 16 |
| 1273.3 | wC5H2  | 16 |        |    |        |    | 1385.6 | dC6O1  | 19 | saC4H2   | 76 | dC6C3    | 34 |
| 1291.1 | sC7-O3 | 36 | saC4H2 | 35 | dC6O1  | 29 | 1402.6 | dC6O1  | 40 | saC4H2   | 10 | dC6C3    | 28 |
| 1309.2 | sC8-O5 | 38 | dsNH   | 32 |        |    | 1466.3 | saC1H2 | 37 | sC8-O5   | 17 | torC8-C1 | 17 |
| 1315.1 | dC6O1  | 38 | saC4H2 | 35 | sC7-O3 | 28 | 1521.4 | saC4H2 | 44 | sC6-O1   |    |          |    |

|        |        |     |        |    |        |        |        |        |        |        |        |        |    |
|--------|--------|-----|--------|----|--------|--------|--------|--------|--------|--------|--------|--------|----|
| 1442.9 | cC5H2  | 66  | cC2H2  | 33 |        | 1531.9 | cC2H2  | 91     |        |        |        |        |    |
| 1466.3 | cC2H2  | 64  | cC5H2  | 32 |        | 1558.9 | cC5H2  | 90     |        |        |        |        |    |
| 1555.7 | daNH'  | 56  | daNH   | 31 |        | 1577.8 | daNH'  | 85     |        |        |        |        |    |
| 1601   | daNH   | 63  | daNH'  | 24 |        | 1624.1 | daNH   | 88     |        |        |        |        |    |
| 1662.4 | sC7-O3 | 59  | sC6-O1 | 34 |        | 1652.7 | sC7-O3 | 44     | dC6C3  | 24     | cC4H2  | 22     |    |
| 1675.5 | sC6-O1 | 58  | sC7-O3 | 35 |        | 1666.2 | sC8-O5 | 91     |        |        |        |        |    |
| 1690.1 | sC8-O5 | 87  |        |    |        | 1681.3 | dC6C3  | 45     | sC7-O3 | 38     | saC4H2 | 16     |    |
| 2812.6 | saC4H2 | 74  | dC6C3  | 40 | ssC4H2 | 33     | 2873.7 | saC4H2 | 84     | dC6C3  | 50     | ssC4H2 | 30 |
| 2842.6 | dC6C3  | 38  | saC3H2 | 34 | ssC3H2 |        | 2887.5 | dC6C3  | 49     | saC4H2 | 32     | saC3H2 | 31 |
| 2886.7 | sN-H   | 92  |        |    |        | 2904.4 | sN-H   | 100    |        |        |        |        |    |
| 2892.4 | ssC2H2 | 63  | saC2H2 | 18 |        | 2905.8 | ssC5H2 | 77     | ssC2H2 | 17     |        |        |    |
| 2897.8 | ssC5H2 | 57  | saC5H2 | 22 |        | 2929   | saC2H2 | 71     | saC5H2 | 25     |        |        |    |
| 2998.9 | saC2H2 | 77  | ssC2H2 | 22 |        | 2931.2 | saC5H2 | 72     | saC2H2 | 24     |        |        |    |
| 3022.5 | saC5H2 | 70  | ssC5H2 | 28 |        | 3138.6 | ssC2H2 | 76     | ssC5H2 | 18     |        |        |    |
| 3168   | sN-H   | 100 |        |    |        | 3261.2 | sN-H   | 99     |        |        |        |        |    |
| 3243   | sN-H   | 100 |        |    |        | 3264.5 | sN-H   | 100    |        |        |        |        |    |

## POTENTIAL ENERGY SURFACES

Torsion parameters were further validated by comparing relaxed QM and MM potential energy surfaces (PES). QM PES calculations were performed at the MP2/G-31G(d) level using the relaxed potential energy scan facility of the default redundant internal coordinate optimizer (keyword “Opt= ModRedundant”) in Gaussian03.<sup>9</sup> This facility constrains the internal coordinates being scanned and minimizes all other coordinates at every scan point. MM PES were calculated by reading the QM geometries of all the scan points into CHARMM, harmonically restraining the target dihedral angles with a force constant of 10,000 kcal/mol rad, and minimizing all the other degrees of freedom. This makes it more likely that the portions of

the molecule that are not being scanned have the same local minimum conformation in the QM and in the MM scan.

The QM and MM PES scans around a dihedral connecting the phenyl ring,  $C_\alpha$  and the amino terminal in DHPG (C2-C1-C7-N) are shown in Figure S3. This phenyl- $C_\alpha$  linkage exists in the other ligands. Hence, together with the equilibrium geometries and the vibrational spectra analysis, these PES scans across the MM and QM validate the MM parameters for the other ligands as well.

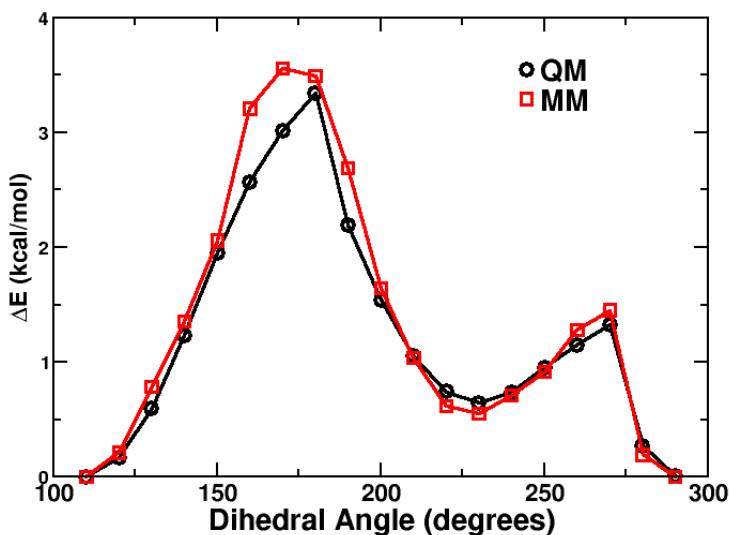

**Figure S3.** Potential energy scan in QM and MM for the C2-C1-C7-N dihedral.

## Conformational Sampling of LBR-ligand complexes

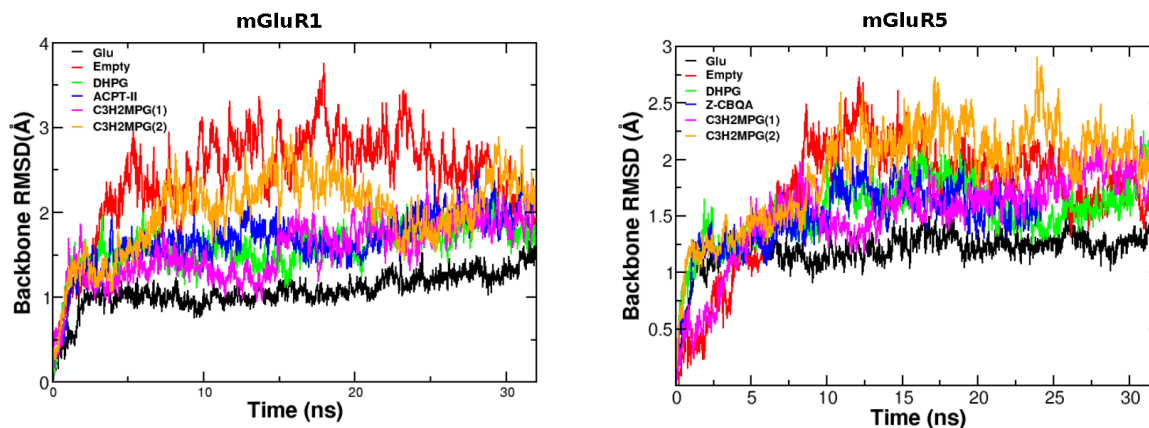

**Figure S4.** Root Mean Squared Deviation (RMSD) of the backbone atoms of the dimeric LBR-ligand complexes (excluding the loops: 33-38, 125-153, 378-410 and 513-22 for mGluR1 and 14-24, 116-140, 360-390, 496-505 for mGluR5) through unconstrained 32 ns explicit water MD simulations. Distances between the pocket  $\alpha$ -carbon atoms pairs from these runs are used to plot the conformationally sampled free energy surfaces in Fig. 5 and 6.



**Table S5.** Fraction of the simulation time spent by the mGluR1+ligand complexes in the closed and maximally open conformations. The maximally opened state is defined as a conformation (defined by the inter-lobe distances,  $d^i$  and  $d^o$ ) when the sampled free energy is the lowest. When the minima conformation ( $d^i$ ,  $d^o$ ) is less than 1 Å from the closed conformation (defined by  $d^i$  and  $d^o$  of mGluR1+Glu), then it is treated as a closed conformation. Same definition is applicable for Table S6.

| Ligand     | Fraction of Time |                        |
|------------|------------------|------------------------|
|            | closed           | $d^{\max/\text{open}}$ |
| Glu        | 0.99             | 0                      |
| Empty      | 0.20             | 0.55                   |
| DHPG       | 0.65             | 0                      |
| ACPT-II    | 0.29             | 0.45                   |
| C3H2MPG(1) | 0.63             | 0                      |
| C3H2MPG(2) | 0.14             | 0.55                   |
| HOMQ       | 0.29             | 0                      |
| C3HPG(1)   | 0.97             | 0                      |
| C3HPG(2)   | 0.39             | 0.4                    |

**Table S6.** Fraction of the simulation time spent by the mGluR5+ligand complexes in the closed and maximally open conformations.

| Ligand     | Fraction of Time |                        |
|------------|------------------|------------------------|
|            | closed           | $d^{\max/\text{open}}$ |
| Glu        | 0.96             | 0                      |
| Empty      | 0.30             | 0.4                    |
| DHPG       | 0.75             | 0                      |
| Z-CBQA     | 0.37             | 0                      |
| C3H2MPG(1) | 0.57             | 0                      |
| C3H2MPG(2) | 0.12             | 0.43                   |
| HOMQ       | 0.23             | 0.31                   |
| C3HPG(1)   | 0.88             | 0                      |
| C3HPG(2)   | 0.12             | 0.23                   |

## REFERENCES

1. Vanommeslaeghe, K.; Hatcher, E.; Acharya, C.; Kundu, S.; Zhong, S.; Shim, J.; Darian, E.; Guvench, O.; Lopes, P.; Vorobyov, I. CHARMM general force field: A force field for drug-like molecules compatible with the CHARMM all-atom additive biological force fields. *J. Comput. Chem.* **2010**, *31*, 671-690.
2. Vanommeslaeghe, K.; MacKerell Jr, A. Automation of the CHARMM General Force Field (CGenFF) I: bond perception and atom typing. *J. Chem. Inf. Model.* **2012**, *52*, 3144-3154.

3. Vanommeslaeghe, K.; Raman, E. P.; MacKerell Jr, A. Automation of the CHARMM General Force Field (CGenFF) II: Assignment of Bonded Parameters and Partial Atomic Charges. *J. Chem. Inform. Model.* **2012**, *52*, 3155-3168.
4. Shim, J.; Coop, A.; MacKerell Jr, A. D. Consensus 3D model of  $\mu$ -opioid receptor ligand efficacy based on a quantitative conformationally sampled pharmacophore. *J. Phy. Chem. B* **2011**, *115*, 7487-7496.
5. Scott, A. P.; Radom, L. Harmonic vibrational frequencies: an evaluation of Hartree-Fock, Møller-Plesset, quadratic configuration interaction, density functional theory, and semiempirical scale factors. *J. Phys. Chem.* **1996**, *100*, 16502-16513.
6. Pulay, P.; Fogarasi, G.; Pang, F.; Boggs, J. E. Systematic ab initio gradient calculation of molecular geometries, force constants, and dipole moment derivatives. *J. Am. Chem. Soc.* **1979**, *101*, 2550-2560.
7. Kuczera, K.; Wiorkiewicz, J.; Karplus, M. MOLVIB: Program for the Analysis of Molecular Vibrations. *CHARMM, Harvard University* **1993**.
8. Brooks, B. R.; Brooks, C. L.; MacKerell, A. D.; Nilsson, L.; Petrella, R.; Roux, B.; Won, Y.; Archontis, G.; Bartels, C.; Boresch, S. CHARMM: the biomolecular simulation program. *J. Comput. Chem.* **2009**, *30*, (10), 1545-1614.
9. Frisch, A.; Cheeseman, J. R.; Hess, J. S. *Gaussian 03 IOps Reference*. Gaussian, Incorporated: 2005.
